# Supplementary material for: Generation and characterization of a mitotane-resistant adrenocortical cell line
Source: PubMed Central journal article supplement — Endocr Connect. 2020 Jan 6;9(2):122–34. doi: 10.1530/EC-19-0510 (PMC6993260; doi:10.1530/ec-19-0510), 2020-01-06
Supplement: supplementary_table_1.pdf [file supplementary_table_1.pdf]

**Supplementary table 1: Internal standards used for discovery of adrenal steroid hormones.**

| <b>Compound</b>          | <b>Provider of compound</b> | <b>Internal standard used for normalization</b> | <b>Provider for Internal standard</b> | <b>RT (min)</b> | <b>Quan MRM</b> | <b>Qual MRM</b> |
|--------------------------|-----------------------------|-------------------------------------------------|---------------------------------------|-----------------|-----------------|-----------------|
| Testosterone             | Sigma Aldrich               | Testosterone-2,2,4,6,6-d5                       | CDN Isotopes                          | 7,32            | 289->97         | 289->109        |
| Dihydrotestosterone      | Sigma Aldrich               | Dihydrotestosterone-2,3,4-13C3 solution         | Sigma Aldrich                         | 8,1             | 291->255        | 212->91         |
| Dexamethasone            | Sigma Aldrich               | Corticosterone-2,2,4,6,6,17 $\alpha$ ,21,21-d8  | CDN isotopes                          | 6               | 393->373        | 393->255        |
| 18OH-Corticosterone      | Cerilliant                  | 18OH-Corticosterone-9,11,12,12-d4               | Sigma Aldrich                         | 3,87            | 363->121        | 363->269        |
| 11-Dehydrocorticosterone | USBiological                | Cortisol-1,2-d <sub>2</sub>                     | CDN isotopes                          | 4,93            | 345->121        | 345->242        |
