# Supplementary material for: Generation and characterization of a mitotane-resistant adrenocortical cell line
Source: PubMed Central journal article supplement — Endocr Connect. 2020 Jan 6;9(2):122–34. doi: 10.1530/EC-19-0510 (PMC6993260; doi:10.1530/ec-19-0510), 2020-01-06
Supplement: supplementary_table_2.pdf [file supplementary_table_2.pdf]

**Supplementary Table 2: Fifty most significantly up- and downregulated genes in resistant versus nonresistant clones, sorted according to log<sub>2</sub> fold change.**

| <b>Gene</b>     | <b>log<sub>2</sub><br/>fold change</b> | <b>Average<br/>Expression</b> | <b>t value</b> | <b>p value</b>         | <b>Adjusted p<br/>value</b> | <b>B value</b> |
|-----------------|----------------------------------------|-------------------------------|----------------|------------------------|-----------------------------|----------------|
| <i>COL3A1</i>   | 5.27                                   | 5.69                          | 35.14          | 4.71x10 <sup>-22</sup> | 6.66x10 <sup>-19</sup>      | 40.30          |
| <i>IGF1</i>     | 4.50                                   | 5.74                          | 21.72          | 3.20x10 <sup>-17</sup> | 9.17x10 <sup>-15</sup>      | 29.51          |
| <i>ANXA2</i>    | 4.47                                   | 6.24                          | 32.24          | 3.53x10 <sup>-21</sup> | 3.79x10 <sup>-18</sup>      | 38.40          |
| <i>ODAM</i>     | 4.36                                   | 5.07                          | 32.77          | 2.41x10 <sup>-21</sup> | 2.85x10 <sup>-18</sup>      | 38.76          |
| <i>PADI2</i>    | 3.49                                   | 5.65                          | 44.86          | 1.51x10 <sup>-24</sup> | 1.30x10 <sup>-20</sup>      | 45.51          |
| <i>ATCAY</i>    | 3.19                                   | 5.03                          | 28.67          | 5.42x10 <sup>-20</sup> | 4.00x10 <sup>-17</sup>      | 35.78          |
| <i>GJA1</i>     | 3.02                                   | 7.04                          | 22.62          | 1.27x10 <sup>-17</sup> | 4.01x10 <sup>-15</sup>      | 30.43          |
| <i>GALNT17</i>  | 3.00                                   | 5.16                          | 35.24          | 4.39x10 <sup>-22</sup> | 6.58x10 <sup>-19</sup>      | 40.36          |
| <i>NOTUM</i>    | 2.87                                   | 5.33                          | 25.62          | 7.32x10 <sup>-19</sup> | 3.59x10 <sup>-16</sup>      | 33.25          |
| <i>SELENBP1</i> | 2.86                                   | 5.81                          | 32.03          | 4.09x10 <sup>-21</sup> | 4.31x10 <sup>-18</sup>      | 38.26          |
| <i>ADCY1</i>    | 2.71                                   | 5.11                          | 25.57          | 7.65x10 <sup>-19</sup> | 3.71x10 <sup>-16</sup>      | 33.20          |
| <i>MMP2</i>     | 2.70                                   | 5.50                          | 21.69          | 3.31x10 <sup>-17</sup> | 9.30x10 <sup>-15</sup>      | 29.48          |
| <i>COL5A2</i>   | 2.54                                   | 5.09                          | 27.98          | 9.52x10 <sup>-20</sup> | 6.29x10 <sup>-17</sup>      | 35.24          |
| <i>NME4</i>     | 2.34                                   | 5.27                          | 27.43          | 1.51x10 <sup>-19</sup> | 9.31x10 <sup>-17</sup>      | 34.79          |
| <i>LGALS1</i>   | 2.28                                   | 7.43                          | 29.30          | 3.27x10 <sup>-20</sup> | 2.53x10 <sup>-17</sup>      | 36.27          |
| <i>KCNH2</i>    | 2.24                                   | 6.57                          | 23.01          | 8.58x10 <sup>-18</sup> | 2.87x10 <sup>-15</sup>      | 30.82          |
| <i>PLAT</i>     | 2.22                                   | 5.20                          | 22.92          | 9.37x10 <sup>-18</sup> | 3.07x10 <sup>-15</sup>      | 30.73          |
| <i>CXXC5</i>    | 2.20                                   | 6.21                          | 24.94          | 1.35x10 <sup>-18</sup> | 5.76x10 <sup>-16</sup>      | 32.65          |
| <i>DLX4</i>     | 1.96                                   | 5.64                          | 27.50          | 1.42x10 <sup>-19</sup> | 8.89x10 <sup>-17</sup>      | 34.85          |
| <i>SMAD1</i>    | 1.62                                   | 5.88                          | 22.30          | 1.75x10 <sup>-17</sup> | 5.36x10 <sup>-15</sup>      | 30.11          |
| <i>CHST3</i>    | 1.53                                   | 5.62                          | 21.71          | 3.24x10 <sup>-17</sup> | 9.22x10 <sup>-15</sup>      | 29.50          |
| <i>NDUFA9</i>   | -1.01                                  | 7.55                          | -22.07         | 2.23x10 <sup>-17</sup> | 6.56x10 <sup>-15</sup>      | 29.87          |
| <i>SULT1A3</i>  | -1.02                                  | 7.62                          | -22.23         | 1.90x10 <sup>-17</sup> | 5.69x10 <sup>-15</sup>      | 30.03          |
| <i>DYRK4</i>    | -1.13                                  | 6.44                          | -21.77         | 3.04x10 <sup>-17</sup> | 8.80x10 <sup>-15</sup>      | 29.57          |
| <i>COPS7A</i>   | -1.24                                  | 6.52                          | -21.70         | 3.28x10 <sup>-17</sup> | 9.27x10 <sup>-15</sup>      | 29.49          |
| <i>DMAPI</i>    | -1.34                                  | 7.20                          | -22.41         | 1.56x10 <sup>-17</sup> | 4.84x10 <sup>-15</sup>      | 30.23          |

|                |       |      |        |                        |                        |       |
|----------------|-------|------|--------|------------------------|------------------------|-------|
| <i>MRAS</i>    | -1.34 | 6.33 | -24.59 | 1.87x10 <sup>-18</sup> | 7.58x10 <sup>-16</sup> | 32.33 |
| <i>NRP2</i>    | -1.52 | 5.69 | -25.88 | 5.78x10 <sup>-19</sup> | 2.98x10 <sup>-16</sup> | 33.48 |
| <i>LTBR</i>    | -1.57 | 6.34 | -23.66 | 4.54x10 <sup>-18</sup> | 1.69x10 <sup>-15</sup> | 31.45 |
| <i>EPB41L1</i> | -1.64 | 7.07 | -24.70 | 1.70x10 <sup>-18</sup> | 7.11x10 <sup>-16</sup> | 32.42 |
| <i>SORBS2</i>  | -1.82 | 6.41 | -23.91 | 3.58x10 <sup>-18</sup> | 1.38x10 <sup>-15</sup> | 31.69 |
| <i>MGST1</i>   | -2.14 | 7.75 | -25.35 | 9.32x10 <sup>-19</sup> | 4.35x10 <sup>-16</sup> | 33.01 |
| <i>RBM47</i>   | -2.17 | 6.46 | -24.03 | 3.18x10 <sup>-18</sup> | 1.25x10 <sup>-15</sup> | 31.80 |
| <i>DAB2</i>    | -2.31 | 7.81 | -25.06 | 1.21x10 <sup>-18</sup> | 5.43x10 <sup>-16</sup> | 32.76 |
| <i>SCARB1</i>  | -2.42 | 7.76 | -40.37 | 1.81x10 <sup>-23</sup> | 4.99x10 <sup>-20</sup> | 43.30 |
| <i>ZDHHC19</i> | -2.43 | 6.20 | -21.73 | 3.17x10 <sup>-17</sup> | 9.12x10 <sup>-15</sup> | 29.52 |
| <i>ACSS1</i>   | -2.51 | 6.11 | -36.93 | 1.47x10 <sup>-22</sup> | 3.04x10 <sup>-19</sup> | 41.38 |
| <i>NR4A3</i>   | -2.61 | 5.65 | -26.71 | 2.79x10 <sup>-19</sup> | 1.59x10 <sup>-16</sup> | 34.19 |
| <i>GRAMD1B</i> | -2.98 | 5.86 | -42.58 | 5.17x10 <sup>-24</sup> | 2.33x10 <sup>-20</sup> | 44.42 |
| <i>VSNL1</i>   | -3.02 | 6.46 | -50.29 | 1.02x10 <sup>-25</sup> | 2.52x10 <sup>-21</sup> | 47.84 |
| <i>SPP1</i>    | -3.38 | 6.39 | -22.62 | 1.27x10 <sup>-17</sup> | 4.01x10 <sup>-15</sup> | 30.43 |
| <i>SPINK5</i>  | -3.62 | 5.91 | -25.65 | 7.07x10 <sup>-19</sup> | 3.54x10 <sup>-16</sup> | 33.28 |
| <i>CYP11A1</i> | -3.65 | 6.45 | -30.50 | 1.28x10 <sup>-20</sup> | 1.15x10 <sup>-17</sup> | 37.17 |
| <i>AGTR1</i>   | -3.94 | 5.26 | -37.46 | 1.05x10 <sup>-22</sup> | 2.26x10 <sup>-19</sup> | 41.69 |
| <i>MAOB</i>    | -4.01 | 5.61 | -39.04 | 4.00x10 <sup>-23</sup> | 1.04x10 <sup>-19</sup> | 42.58 |
| <i>DDIT4L</i>  | -4.31 | 5.70 | -34.95 | 5.33x10 <sup>-22</sup> | 7.33x10 <sup>-19</sup> | 40.18 |
| <i>CYP21A2</i> | -4.42 | 6.61 | -28.32 | 7.20x10 <sup>-20</sup> | 5.02x10 <sup>-17</sup> | 35.51 |
| <i>PDE2A</i>   | -4.68 | 5.89 | -35.19 | 4.55x10 <sup>-22</sup> | 6.62x10 <sup>-19</sup> | 40.33 |
| <i>CPB1</i>    | -4.72 | 5.78 | -33.91 | 1.08x10 <sup>-21</sup> | 1.37x10 <sup>-18</sup> | 39.52 |
| <i>HSD3B2</i>  | -5.54 | 5.33 | -30.22 | 1.59x10 <sup>-20</sup> | 1.38x10 <sup>-17</sup> | 36.96 |
