# Supplementary material for: Generation and characterization of a mitotane-resistant adrenocortical cell line
Source: PubMed Central journal article supplement — Endocr Connect. 2020 Jan 6;9(2):122–34. doi: 10.1530/EC-19-0510 (PMC6993260; doi:10.1530/ec-19-0510), 2020-01-06
Supplement: supplementary_table_3.pdf [file supplementary_table_3.pdf]

**Supplementary table 3: Pathways altered in resistant compared to nonresistant clones****(GO enrichment analysis)**

| <b>GO.ID</b>      | <b>Term</b>                                                | <b># Annotated<br/>Genes</b> | <b># Regulated<br/>Genes</b> | <b>Reg</b> | <b>Fisher<br/>P Value</b> |
|-------------------|------------------------------------------------------------|------------------------------|------------------------------|------------|---------------------------|
| <b>GO:0043068</b> | positive regulation<br>of programmed cell<br>death         | 361                          | 50                           | Up         | 0.00010                   |
| <b>GO:0045778</b> | positive regulation<br>of ossification                     | 43                           | 12                           | Up         | 0.00011                   |
| <b>GO:0030048</b> | actin filament-based<br>movement                           | 56                           | 14                           | Up         | 0.00011                   |
| <b>GO:0048608</b> | reproductive<br>structure<br>development                   | 215                          | 34                           | Up         | 0.00011                   |
| <b>GO:2000027</b> | regulation of organ<br>morphogenesis                       | 147                          | 26                           | Up         | 0.00011                   |
| <b>GO:0003231</b> | cardiac ventricle<br>development                           | 63                           | 15                           | Up         | 0.00011                   |
| <b>GO:0010976</b> | positive regulation<br>of neuron projection<br>development | 139                          | 25                           | Up         | 0.00011                   |
| <b>GO:0002521</b> | leukocyte<br>differentiation                               | 198                          | 32                           | Up         | 0.00011                   |
| <b>GO:0051271</b> | negative regulation<br>of cellular                         | 131                          | 24                           | Up         | 0.00011                   |

| <b>GO.ID</b>      | <b>Term</b>                                 | <b># Annotated<br/>Genes</b> | <b># Regulated<br/>Genes</b> | <b>Reg</b> | <b>Fisher<br/>P Value</b> |
|-------------------|---------------------------------------------|------------------------------|------------------------------|------------|---------------------------|
|                   | component<br>movement                       |                              |                              |            |                           |
| <b>GO:0007405</b> | neuroblast                                  | 26                           | 9                            | Up         | 0.00013                   |
|                   | proliferation                               |                              |                              |            |                           |
| <b>GO:0055117</b> | regulation of cardiac<br>muscle contraction | 26                           | 9                            | Up         | 0.00013                   |
| <b>GO:0060412</b> | ventricular septum                          | 26                           | 9                            | Up         | 0.00013                   |
|                   | morphogenesis                               |                              |                              |            |                           |
| <b>GO:0007369</b> | gastrulation                                | 108                          | 21                           | Up         | 0.00013                   |
| <b>GO:0061138</b> | morphogenesis of a<br>branching epithelium  | 78                           | 17                           | Up         | 0.00013                   |
| <b>GO:0008038</b> | neuron recognition                          | 16                           | 7                            | Up         | 0.00013                   |
| <b>GO:0048514</b> | blood vessel<br>morphogenesis               | 233                          | 36                           | Down       | 0.00010                   |
| <b>GO:0008202</b> | steroid metabolic<br>process                | 164                          | 28                           | Down       | 0.00011                   |
| <b>GO:0070372</b> | regulation of ERK1<br>and ERK2 cascade      | 102                          | 20                           | Down       | 0.00015                   |
| <b>GO:0006704</b> | glucocorticoid<br>biosynthetic process      | 8                            | 5                            | Down       | 0.00015                   |
| <b>GO:0008211</b> | glucocorticoid<br>metabolic process         | 12                           | 6                            | Down       | 0.00016                   |
| <b>GO:0050896</b> | response to stimulus                        | 4190                         | 383                          | Down       | 0.00019                   |

| <b>GO.ID</b>      | <b>Term</b>                                       | <b># Annotated<br/>Genes</b> | <b># Regulated<br/>Genes</b> | <b>Reg</b> | <b>Fisher<br/>P Value</b> |
|-------------------|---------------------------------------------------|------------------------------|------------------------------|------------|---------------------------|
| <b>GO:0009605</b> | response to external<br>stimulus                  | 914                          | 103                          | Down       | 0.00019                   |
| <b>GO:0032501</b> | multicellular<br>organismal process               | 3139                         | 297                          | Down       | 0.00019                   |
| <b>GO:0036150</b> | phosphatidylserine<br>acyl-chain<br>remodeling    | 5                            | 4                            | Down       | 0.00020                   |
| <b>GO:0002920</b> | regulation of<br>humoral immune<br>response       | 17                           | 7                            | Down       | 0.00020                   |
| <b>GO:0030855</b> | epithelial cell<br>differentiation                | 287                          | 41                           | Down       | 0.00021                   |
| <b>GO:0001525</b> | angiogenesis                                      | 189                          | 30                           | Down       | 0.00024                   |
| <b>GO:0043277</b> | apoptotic cell<br>clearance                       | 18                           | 7                            | Down       | 0.00031                   |
| <b>GO:0032101</b> | regulation of<br>response to external<br>stimulus | 274                          | 39                           | Down       | 0.00031                   |
| <b>GO:0009410</b> | response to<br>xenobiotic stimulus                | 48                           | 12                           | Down       | 0.00032                   |

Reg, regulation.
