# Supplementary material for: Generation and characterization of a mitotane-resistant adrenocortical cell line
Source: PubMed Central journal article supplement — Endocr Connect. 2020 Jan 6;9(2):122–34. doi: 10.1530/EC-19-0510 (PMC6993260; doi:10.1530/ec-19-0510), 2020-01-06
Supplement: supplementary_table_4.pdf [file supplementary_table_4.pdf]

**Supplementary table 4: Pathways altered in mitotane-treated nonresistant clones compared to DMSO-treated clones (GO enrichment analysis, selection)**

| <b>GO.ID</b>      | <b>Term</b>                                           | <b># Annotated<br/>Genes</b> | <b># Regulated<br/>Genes</b> | <b>Reg</b> | <b>Fisher<br/>P Value</b> |
|-------------------|-------------------------------------------------------|------------------------------|------------------------------|------------|---------------------------|
| <b>GO:0043038</b> | amino acid activation                                 | 49                           | 4                            | Up         | 0.00011                   |
| <b>GO:0015804</b> | neutral amino acid<br>transport                       | 19                           | 3                            | Up         | 0.00011                   |
| <b>GO:0006865</b> | amino acid transport                                  | 57                           | 4                            | Up         | 0.00019                   |
| <b>GO:0044281</b> | small molecule<br>metabolic process                   | 1241                         | 16                           | Up         | 0.00024                   |
| <b>GO:0043648</b> | dicarboxylic acid<br>metabolic process                | 61                           | 4                            | Up         | 0.00025                   |
| <b>GO:0006564</b> | L-serine biosynthetic<br>process                      | 6                            | 2                            | Up         | 0.00038                   |
| <b>GO:0043090</b> | amino acid import                                     | 6                            | 2                            | Up         | 0.00038                   |
| <b>GO:0055090</b> | acylglycerol<br>homeostasis                           | 8                            | 2                            | Up         | 0.00070                   |
| <b>GO:0070233</b> | negative regulation<br>of T cell apoptotic<br>process | 8                            | 2                            | Up         | 0.00070                   |
| <b>GO:0070328</b> | triglyceride<br>homeostasis                           | 8                            | 2                            | Up         | 0.00070                   |
| <b>GO:0061061</b> | muscle structure<br>development                       | 308                          | 7                            | Up         | 0.00086                   |

| <b>GO.ID</b>      | <b>Term</b>                                    | <b># Annotated</b> | <b># Regulated</b> | <b>Reg</b> | <b>Fisher</b>  |
|-------------------|------------------------------------------------|--------------------|--------------------|------------|----------------|
|                   |                                                | <b>Genes</b>       | <b>Genes</b>       |            | <b>P Value</b> |
| <b>GO:0036500</b> | ATF6-mediated<br>unfolded protein<br>response  | 10                 | 2                  | Up         | 0.00112        |
| <b>GO:0046655</b> | folic acid metabolic<br>process                | 12                 | 2                  | Up         | 0.00163        |
| <b>GO:0008219</b> | cell death                                     | 1187               | 14                 | Up         | 0.00168        |
| <b>GO:0034220</b> | ion transmembrane<br>transport                 | 453                | 8                  | Up         | 0.00183        |
| <b>GO:0006636</b> | unsaturated fatty acid<br>biosynthetic process | 18                 | 2                  | Down       | 0.00011        |
| <b>GO:0043436</b> | oxoacid metabolic<br>process                   | 671                | 5                  | Down       | 0.00013        |
| <b>GO:0006082</b> | organic acid<br>metabolic process              | 674                | 5                  | Down       | 0.00013        |
| <b>GO:0032365</b> | intracellular lipid<br>transport               | 22                 | 2                  | Down       | 0.00017        |
| <b>GO:0071398</b> | cellular response to<br>fatty acid             | 28                 | 2                  | Down       | 0.00028        |
| <b>GO:0042632</b> | cholesterol<br>homeostasis                     | 29                 | 2                  | Down       | 0.00030        |
| <b>GO:0055092</b> | sterol homeostasis                             | 29                 | 2                  | Down       | 0.00030        |
| <b>GO:0015914</b> | phospholipid<br>transport                      | 31                 | 2                  | Down       | 0.00035        |

| <b>GO.ID</b>      | <b>Term</b>                             | <b># Annotated</b> | <b># Regulated</b> | <b>Reg</b> | <b>Fisher</b>  |
|-------------------|-----------------------------------------|--------------------|--------------------|------------|----------------|
|                   |                                         | <b>Genes</b>       | <b>Genes</b>       |            | <b>P Value</b> |
| <b>GO:0042472</b> | inner ear<br>morphogenesis              | 31                 | 2                  | Down       | 0.00035        |
| <b>GO:0045017</b> | glycerolipid<br>biosynthetic process    | 166                | 3                  | Down       | 0.00037        |
| <b>GO:0016053</b> | organic acid<br>biosynthetic process    | 169                | 3                  | Down       | 0.00039        |
| <b>GO:0046394</b> | carboxylic acid<br>biosynthetic process | 169                | 3                  | Down       | 0.00039        |
| <b>GO:0030301</b> | cholesterol transport                   | 34                 | 2                  | Down       | 0.00042        |
| <b>GO:0015918</b> | sterol transport                        | 40                 | 2                  | Down       | 0.00058        |
| <b>GO:0070542</b> | response to fatty acid                  | 42                 | 2                  | Down       | 0.00064        |

Reg, regulation.
