# Supplementary material for: Generation and characterization of a mitotane-resistant adrenocortical cell line
Source: PubMed Central journal article supplement — Endocr Connect. 2020 Jan 6;9(2):122–34. doi: 10.1530/EC-19-0510 (PMC6993260; doi:10.1530/ec-19-0510), 2020-01-06
Supplement: supplementary_table_5.pdf [file supplementary_table_5.pdf]

**Supplementary Table 5: Amount of lipoprotein species per protein in nonresistant and resistant clones (N=3)**

| <b>Lipid Species</b> | <b>CCS (%)</b> | <b>Condition</b> | <b>Mitotane (<math>\mu\text{M}</math>)</b> | <b>Amount (nmol/mg Protein)</b> |                   |
|----------------------|----------------|------------------|--------------------------------------------|---------------------------------|-------------------|
| <b>FC</b>            | 0              | NR               | 0                                          | $41.84 \pm 2.03$                |                   |
|                      |                |                  | 10                                         | $53.32 \pm 4.48$                |                   |
|                      |                | R                | 0                                          | $42.97 \pm 6.20$                |                   |
|                      |                |                  | 10                                         | $42.55 \pm 2.07$                |                   |
|                      |                | 5                | NR                                         | 0                               | $58.73 \pm 2.34$  |
|                      |                |                  |                                            | 20                              | $63.34 \pm 6.18$  |
|                      | R              |                  | 50                                         | $90.98 \pm 14.72$               |                   |
|                      |                |                  | 0                                          | $48.73 \pm 6.31$                |                   |
|                      | R              |                  | 20                                         | $54.12 \pm 7.39$                |                   |
|                      |                |                  | 50                                         | $51.13 \pm 7.79$                |                   |
|                      | <b>CE</b>      | 0                | NR                                         | 0                               | $10.72 \pm 10.55$ |
|                      |                |                  |                                            | 10                              | $13.45 \pm 10.79$ |
| R                    |                |                  | 0                                          | $1.60 \pm 0.98$                 |                   |
|                      |                |                  | 10                                         | $1.32 \pm 0.57$                 |                   |

| Lipid Species | CCS (%) | Condition | Mitotane ( $\mu\text{M}$ ) | Amount (nmol/mg Protein) |
|---------------|---------|-----------|----------------------------|--------------------------|
| Cer           | 5       | NR        | 0                          | $54.44 \pm 11.78$        |
|               |         |           | 20                         | $63.10 \pm 2.44$         |
|               |         |           | 50                         | $59.29 \pm 4.76$         |
|               |         | R         | 0                          | $1.79 \pm 0.22$          |
|               |         |           | 20                         | $1.78 \pm 0.14$          |
|               |         |           | 50                         | $1.87 \pm 0.17$          |
|               | 0       | NR        | 0                          | $1.73 \pm 0.28$          |
|               |         |           | 10                         | $2.58 \pm 0.43$          |
|               |         |           | 0                          | $1.48 \pm 0.20$          |
|               |         | R         | 10                         | $2.39 \pm 0.46$          |
|               |         |           | 0                          | $2.24 \pm 0.234$         |
|               |         |           | 20                         | $2.80 \pm 0.264$         |
|               | 5       | NR        | 50                         | $4.11 \pm 0.68$          |
|               |         |           | R                          | 0                        |

| Lipid Species | CCS (%) | Condition | Mitotane ( $\mu\text{M}$ ) | Amount (nmol/mg Protein) |
|---------------|---------|-----------|----------------------------|--------------------------|
|               |         |           | 20                         | $1.41 \pm 0.25$          |
|               |         |           | 50                         | $1.40 \pm 0.10$          |
| LPC           | 0       | NR        | 0                          | $0.20 \pm 0.084$         |
|               |         |           | 10                         | $0.51 \pm 0.068$         |
|               |         | R         | 0                          | $0.23 \pm 0.027$         |
|               |         |           | 10                         | $0.44 \pm 0.070$         |
|               | 5       | NR        | 0                          | $0.65 \pm 0.16$          |
|               |         |           | 20                         | $0.79 \pm 0.17$          |
|               |         |           | 50                         | $1.48 \pm 0.44$          |
|               |         |           | 0                          | $0.28 \pm 0.026$         |
|               |         | R         | 20                         | $0.44 \pm 0.07$          |
|               |         |           | 50                         | $0.69 \pm 0.079$         |

CCS, cosmic calf serum; FC, free cholesterol; CE, cholesteryl ester; Cer, ceramide; LPC, lysophosphatidylcholine; NR, nonresistant clones; R, resistant clones.
