# Supplementary material for: Generation and characterization of a mitotane-resistant adrenocortical cell line
Source: PubMed Central journal article supplement — Endocr Connect. 2020 Jan 6;9(2):122–34. doi: 10.1530/EC-19-0510 (PMC6993260; doi:10.1530/ec-19-0510), 2020-01-06
Supplement: supplementary_table_6.pdf [file supplementary_table_6.pdf]

**Supplementary Table 6: Fold changes and p-values for comparisons of intracellular lipids.**

| <b>Lipid species</b> | <b>CCS (%)</b> | <b>Comparison</b>                      | <b>Fold change</b> | <b>p-Value</b>                         |      |      |
|----------------------|----------------|----------------------------------------|--------------------|----------------------------------------|------|------|
| <b>FC</b>            | 0              | 0 $\mu$ M vs. 10 $\mu$ M mitotane (NR) | 1.27               | 0.089                                  |      |      |
|                      |                | 0 $\mu$ M vs. 10 $\mu$ M mitotane (R)  | 0.99               | 0.66                                   |      |      |
|                      |                | R vs. NR (0 $\mu$ M mitotane)          | 1.03               | 0.63                                   |      |      |
|                      |                | R vs. NR (10 $\mu$ M mitotane)         | 0.80               | 0.10                                   |      |      |
|                      | 5              | 0 $\mu$ M vs. 20 $\mu$ M mitotane (NR) | 1.08               | 0.35                                   |      |      |
|                      |                | 0 $\mu$ M vs. 50 $\mu$ M mitotane (NR) | 6.30               | <0.0001                                |      |      |
|                      |                | 0 $\mu$ M vs. 20 $\mu$ M mitotane (R)  | 1.11               | 0.32                                   |      |      |
|                      |                | 0 $\mu$ M vs. 50 $\mu$ M mitotane (R)  | 1.23               | 0.53                                   |      |      |
|                      |                | R vs. NR (0 $\mu$ M mitotane)          | 0.83               | 0.12                                   |      |      |
|                      |                | R vs. NR (20 $\mu$ M mitotane)         | 0.85               | 0.14                                   |      |      |
|                      |                | R vs. NR (50 $\mu$ M mitotane)         | 0.56               | <0.0001                                |      |      |
|                      |                | <b>CE</b>                              | 0                  | 0 $\mu$ M vs. 10 $\mu$ M mitotane (NR) | 1.25 | 0.97 |

| <b>Lipid species</b> | <b>CCS (%)</b> | <b>Comparison</b>                      | <b>Fold change</b> | <b>p-Value</b> |
|----------------------|----------------|----------------------------------------|--------------------|----------------|
|                      |                | 0 $\mu$ M vs. 10 $\mu$ M mitotane (R)  | 0.82               | 0.92           |
|                      |                | R vs. NR (0 $\mu$ M mitotane)          | 0.15               | 0.29           |
|                      |                | R vs. NR (10 $\mu$ M mitotane)         | 0.10               | 0.14           |
|                      | 5              | 0 $\mu$ M vs. 20 $\mu$ M mitotane (NR) | 1.16               | 0.92           |
|                      |                | 0 $\mu$ M vs. 50 $\mu$ M mitotane (NR) | 0.40               | 0.97           |
|                      |                | 0 $\mu$ M vs. 20 $\mu$ M mitotane (R)  | 0.99               | 0.97           |
|                      |                | 0 $\mu$ M vs. 50 $\mu$ M mitotane (R)  | 0.75               | 0.92           |
|                      |                | R vs. NR (0 $\mu$ M mitotane)          | 0.03               | 0.091          |
|                      |                | R vs. NR (20 $\mu$ M mitotane)         | 0.03               | 0.072          |
|                      |                | R vs. NR (50 $\mu$ M mitotane)         | 0.03               | 0.12           |
| <b>Cer</b>           | 0              | 0 $\mu$ M vs. 10 $\mu$ M mitotane (NR) | 1.49               | 0.0063         |
|                      |                | 0 $\mu$ M vs. 10 $\mu$ M mitotane (R)  | 1.62               | 0.26           |

| <b>Lipid species</b> | <b>CCS (%)</b> | <b>Comparison</b>                      | <b>Fold change</b> | <b>p-Value</b> |
|----------------------|----------------|----------------------------------------|--------------------|----------------|
|                      |                | R vs. NR (0 $\mu$ M mitotane)          | 0.85               | 0.21           |
|                      |                | R vs. NR (10 $\mu$ M mitotane)         | 0.93               | 0.0041         |
|                      | 5              | 0 $\mu$ M vs. 20 $\mu$ M mitotane (NR) | 1.25               | 0.044          |
|                      |                | 0 $\mu$ M vs. 50 $\mu$ M mitotane (NR) | 2.89               | <0.0001        |
|                      |                | 0 $\mu$ M vs. 20 $\mu$ M mitotane (R)  | 1.02               | 0.41           |
|                      |                | 0 $\mu$ M vs. 50 $\mu$ M mitotane (R)  | 0.37               | 0.41           |
|                      |                | R vs. NR (0 $\mu$ M mitotane)          | 0.62               | 0.0063         |
|                      |                | R vs. NR (20 $\mu$ M mitotane)         | 0.50               | 0.00020        |
|                      |                | R vs. NR (50 $\mu$ M mitotane)         | 0.34               | <0.0001        |
| <b>LPC</b>           | 0              | 0 $\mu$ M vs. 10 $\mu$ M mitotane (NR) | 2.58               | 0.042          |
|                      |                | 0 $\mu$ M vs. 10 $\mu$ M mitotane (R)  | 1.90               | 0.12           |
|                      |                | R vs. NR (0 $\mu$ M mitotane)          | 1.17               | 0.48           |
|                      |                | R vs. NR (10 $\mu$ M mitotane)         | 0.86               | 0.40           |

| <b>Lipid species</b> | <b>CCS (%)</b> | <b>Comparison</b>                      | <b>Fold change</b> | <b>p-Value</b> |
|----------------------|----------------|----------------------------------------|--------------------|----------------|
|                      | 5              | 0 $\mu$ M vs. 20 $\mu$ M mitotane (NR) | 1.22               | 0.22           |
|                      |                | 0 $\mu$ M vs. 50 $\mu$ M mitotane (NR) | 2.77               | <0.0001        |
|                      |                | 0 $\mu$ M vs. 20 $\mu$ M mitotane (R)  | 1.57               | 0.20           |
|                      |                | 0 $\mu$ M vs. 50 $\mu$ M mitotane (R)  | 3.09               | 0.01           |
|                      |                | R vs. NR (0 $\mu$ M mitotane)          | 0.43               | 0.02           |
|                      |                | R vs. NR (20 $\mu$ M mitotane)         | 0.56               | 0.02           |
|                      |                | R vs. NR (50 $\mu$ M mitotane)         | 0.46               | <0.0001        |

CCS, cosmic calf serum; FC, free cholesterol; CE, cholesteryl ester; Cer, ceramide; LPC, lysophosphatidylcholine; NR, nonresistant clones; R, resistant clones. Statistics: Kruskal-Wallis test or one-way ANOVA and two-stage Benjamini, Krieger, & Yekutieli FDR procedure.
