# Supplementary figures and images for: Generation and characterization of a mitotane-resistant adrenocortical cell line
Source: PubMed Central journal article supplement — Endocr Connect. 2020 Jan 6;9(2):122–34. doi: 10.1530/EC-19-0510 (PMC6993260; doi:10.1530/ec-19-0510), 2020-01-06

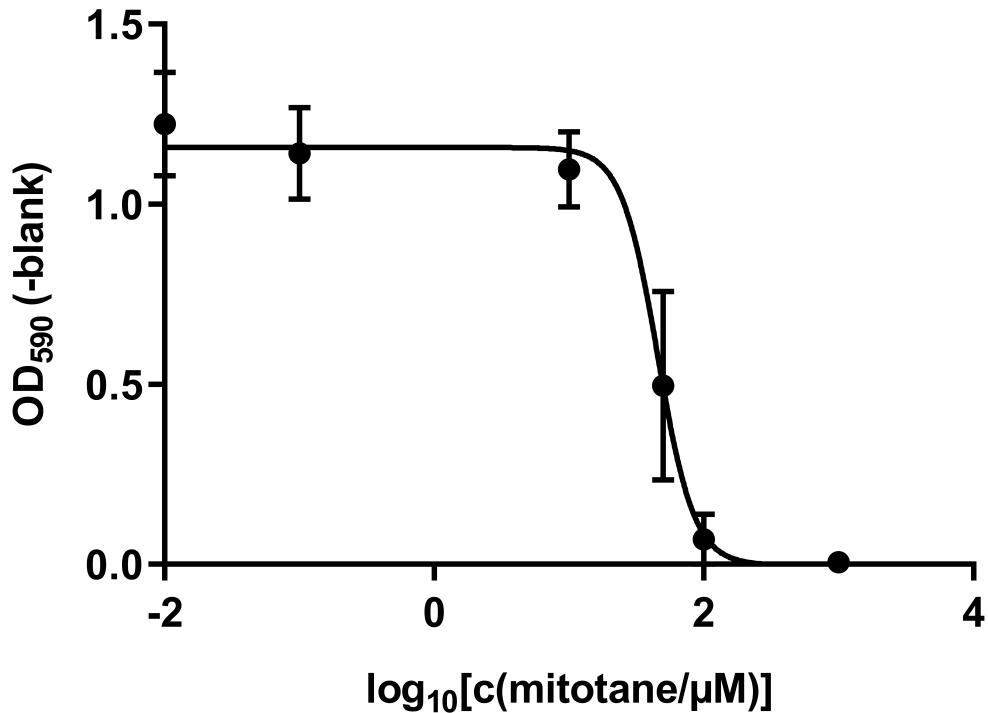

Supplement: supplementary_figure_1.pdf [file supplementary_figure_1.pdf]

Nonresistant (DMSO)

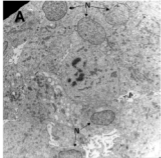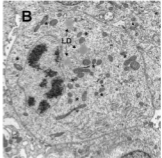

Nonresistant (mitotane)

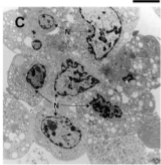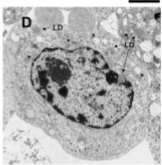

Resistant (DMSO)

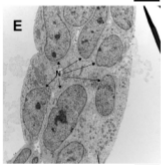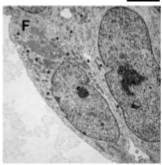

Resistant (mitotane)

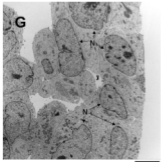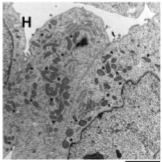

Supplement: supplementary_figure_2.pdf [file supplementary_figure_2.pdf]

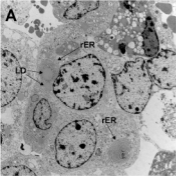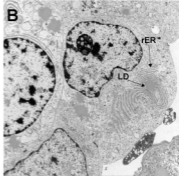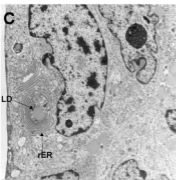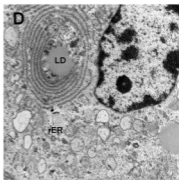

Supplement: supplementary_figure_3.pdf [file supplementary_figure_3.pdf]

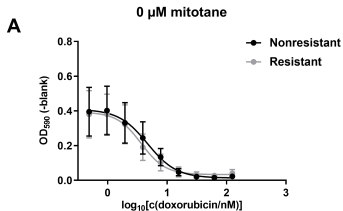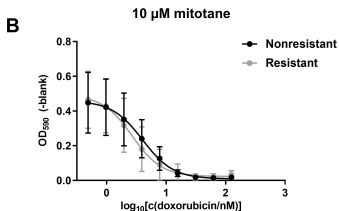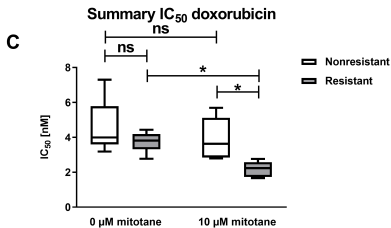

Supplement: supplementary_figure_4.pdf [file supplementary_figure_4.pdf]

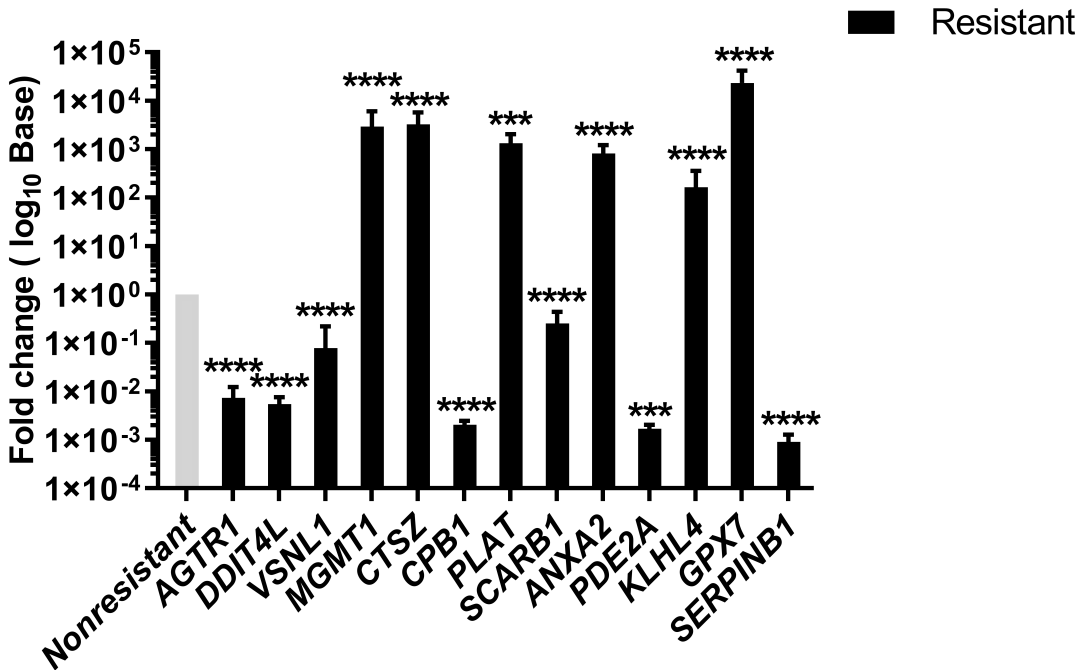

Supplement: supplementary_figure_5.pdf [file supplementary_figure_5.pdf]

**A**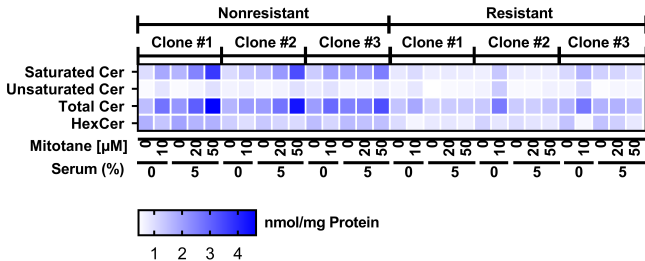**B**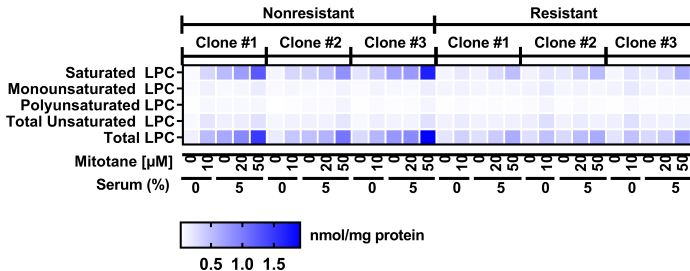

Supplement: supplementary_figure_6.pdf [file supplementary_figure_6.pdf]

**A**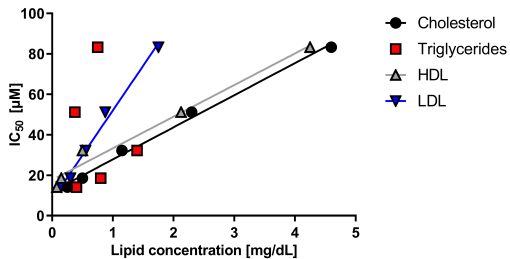**B**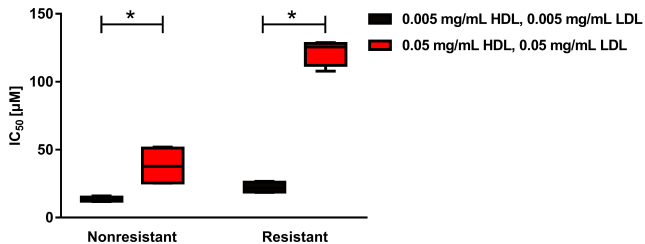

Supplement: supplementary_figure_7.pdf [file supplementary_figure_7.pdf]
